# Supplementary material for: Population Stratification of a Common APOBEC Gene Deletion Polymorphism
Source: PLOS journal article supplement (doi:10.1371/journal.pgen.0030063), 2007-04-17
Supplement: S5 (10.1371/journal.pgen.0030063.s005) [file journal.pgen.0030063.s005]

Supplementary Table 5: HapMap Genotype Frequencies.

|  | Genotype Counts | | |  |
| --- | --- | --- | --- | --- |
| Population | D/D | D/I | I/I | HWE |
| YRI | 0 | 3 | 57 | 1 |
| CEU | 0 | 8 | 52 | 1 |
| CHB | 7 | 19 | 19 | 0.5323 |
| JPT | 7 | 21 | 17 | 1 |
| JPT+CHB | 14 | 40 | 36 | 0.6544 |

Columns as indicated in Supplementary table 4.
